# Supplementary material
Source: MDPI journal article supplement (https://www.mdpi.com/2075-163X/11/10/1133)
Supplement: s1 [file s1]

## Supplementary Materials

**Table S1.** Full table of Krugersdorp water samples analytical results for PHEs.

|    |                     | Ag    | Al   | As    | Au    | B    | Ba    | Be    | Bi    | Br  | Ca     | Cd    | Ce    | Cl   | Co   | Cr   | Cs   | Cu  |
|----|---------------------|-------|------|-------|-------|------|-------|-------|-------|-----|--------|-------|-------|------|------|------|------|-----|
|    |                     | PPB   | PPB  | PPB   | PPB   | PPB  | PPB   | PPB   | PPB   | PPB | PPM    | PPB   | PPB   | PPM  | PPB  | PPB  | PPB  | PPB |
| DL |                     | 0.05  | 1    | 0.5   | 0.05  | 5    | 0.05  | 0.05  | 0.05  | 5   | 0.05   | 0.05  | 0.01  | 1    | 0.02 | 0.5  | 0.01 | 0.1 |
| No | Sample              |       |      |       |       |      |       |       |       |     |        |       |       |      |      |      |      |     |
| 1  | KW1A                | 0.21  | 40   | 17.1  | <0.05 | 41   | 39.58 | <0.05 | 0.13  | 100 | 19.11  | 0.28  | 4.8   | 2259 | 0.14 | 1.6  | 0.18 | 6.4 |
| 2  | KW2A                | <100  | <600 | <3000 | <500  | <400 | <80   | *     | <3000 | *   | 737.4  | <700  | *     | *    | <300 | <300 | *    | <80 |
| 3  | KW3A                | 0.22  | 12   | 29.1  | <0.05 | 13   | 3.57  | <0.05 | <0.05 | 87  | 27.41  | 0.08  | 0.12  | 2704 | 6.05 | 4    | 0.16 | 4.9 |
| 4  | KW4A                | <100  | <600 | <3000 | <500  | <400 | <80   | *     | <3000 | *   | 554.7  | <700  | *     | *    | <300 | <300 | *    | <80 |
| 5  | KW5A                | <100  | <600 | <3000 | <500  | <400 | <80   | *     | <3000 | *   | 565.2  | <700  | *     | *    | <300 | <300 | *    | <80 |
| 6  | KW6A                | 0.16  | 31   | 32.2  | <0.05 | 19   | 24.48 | <0.05 | 0.07  | 118 | 27.86  | 0.77  | 0.12  | 2513 | 0.51 | 2.9  | 0.14 | 8   |
| 7  | KW7A                | <100  | <600 | <3000 | <500  | <400 | <80   | *     | <3000 | *   | 602.6  | <700  | *     | *    | <300 | <300 | *    | <80 |
| 8  | KW8A                | <100  | <600 | <3000 | <500  | <400 | <80   | *     | <3000 | *   | 588.5  | <700  | *     | *    | <300 | <300 | *    | <80 |
| 9  | KW9A                | <100  | <600 | <3000 | <500  | <400 | <80   | *     | <3000 | *   | 745.2  | <700  | *     | *    | <300 | <300 | *    | <80 |
| 10 | KW10A               | <100  | <600 | <3000 | <500  | <400 | <80   | *     | <3000 | *   | 868.5  | <700  | *     | *    | <300 | <300 | *    | <80 |
| 11 | KW1B                | <0.05 | 12   | 3.7   | <0.05 | 12   | 33.6  | <0.05 | <0.05 | 48  | 18.91  | 0.06  | 0.05  | 7    | 0.3  | 2.4  | 0.02 | 3.4 |
| 12 | KW2B                | <100  | <600 | <3000 | <500  | <400 | <80   | *     | <3000 | *   | 674.4  | <700  | *     | *    | <300 | <300 | *    | <80 |
| 13 | KW3B                | <0.05 | 9    | 1     | <0.05 | <5   | 3.82  | <0.05 | <0.05 | 20  | 25.62  | <0.05 | 0.01  | 2    | 5.67 | 3.3  | 0.05 | 2.1 |
| 14 | KW4B                | <100  | <600 | <3000 | <500  | <400 | <80   | *     | <3000 | *   | 557.4  | <700  | *     | *    | <300 | <300 | *    | <80 |
| 15 | KW5B                | <100  | <600 | <3000 | <500  | <400 | <80   | *     | <3000 | *   | 531.4  | <700  | *     | *    | <300 | <300 | *    | <80 |
| 16 | KW6B                | <0.05 | 31   | 3.2   | <0.05 | 22   | 26.87 | <0.05 | <0.05 | 62  | 29.31  | 0.31  | 0.1   | 10   | 0.59 | 2.5  | 0.09 | 7.8 |
| 17 | KW7B                | <100  | <600 | <3000 | <500  | <400 | <80   | *     | <3000 | *   | 608.7  | <700  | *     | *    | <300 | <300 | *    | <80 |
| 18 | KW8B                | <100  | <600 | <3000 | <500  | <400 | <80   | *     | <3000 | *   | 579.4  | <700  | *     | *    | <300 | <300 | *    | <80 |
| 19 | KW9B                | 105   | <600 | <3000 | <500  | <400 | <80   | *     | <3000 | *   | 820.9  | <700  | *     | *    | <300 | <300 | *    | <80 |
| 20 | KW10B               | 100   | <600 | <3000 | <500  | <400 | <80   | *     | <3000 | *   | 1016.5 | <700  | *     | *    | <300 | <300 | *    | <80 |
| 21 | KW1C                | <0.05 | 1    | 3.2   | <0.05 | 11   | 32.08 | <0.05 | <0.05 | 45  | 20.23  | <0.05 | <0.01 | 7    | 0.07 | 3.1  | 0.04 | 2.1 |
| 22 | KW2C                | <100  | <600 | <3000 | <500  | <400 | <80   | *     | <3000 | *   | 726.8  | <700  | *     | *    | <300 | <300 | *    | <80 |
| 23 | KW3C                | <0.05 | 3    | 0.7   | <0.05 | 5    | 3.34  | <0.05 | <0.05 | 21  | 27.87  | <0.05 | <0.01 | 1    | 6.16 | 5    | 0.05 | 0.8 |
| 24 | KW4C                | <100  | <600 | <3000 | <500  | <400 | <80   | *     | <3000 | *   | 582.1  | <700  | *     | *    | <300 | <300 | *    | <80 |
| 25 | KW5C                | <100  | <600 | <3000 | <500  | <400 | <80   | *     | <3000 | *   | 561    | <700  | *     | *    | <300 | <300 | *    | <80 |
| 26 | KW6C                | <0.05 | 4    | 3.2   | <0.05 | 20   | 27.34 | <0.05 | <0.05 | 65  | 30.47  | 0.1   | <0.01 | 10   | 0.27 | 4.5  | 0.05 | 4.8 |
| 27 | KW7C                | <100  | <600 | <3000 | <500  | <400 | <80   | *     | <3000 | *   | 596.8  | <700  | *     | *    | <300 | <300 | *    | <80 |
| 28 | KW8C                | <100  | <600 | <3000 | <500  | <400 | <80   | *     | <3000 | *   | 659.5  | <700  | *     | *    | <300 | <300 | *    | <80 |
| 29 | KW9C                | <100  | <600 | <3000 | <500  | <400 | <80   | *     | <3000 | *   | 732.3  | <700  | *     | *    | <300 | <300 | *    | <80 |
| 30 | KW10C               | <100  | <600 | <3000 | <500  | <400 | <80   | *     | <3000 | *   | 952.1  | <700  | *     | *    | <300 | <300 | *    | <80 |
| 31 | Pulp Duplicates     |       |      |       |       |      |       |       |       |     |        |       |       |      |      |      |      |     |
| 32 | KW1A                | 0.21  | 40   | 17.1  | <0.05 | 41   | 39.58 | <0.05 | 0.13  | 100 | 19.11  | 0.28  | 4.8   | 2259 | 0.14 | 1.6  | 0.18 | 6.4 |
| 33 | KW1A                | 0.16  | 41   | 22.2  | <0.05 | 44   | 41.89 | <0.05 | 0.07  | 99  | 20     | 0.31  | 4.77  | 2326 | 0.16 | 2.2  | 0.14 | 6.8 |
| 34 | Reference Materials |       |      |       |       |      |       |       |       |     |        |       |       |      |      |      |      |     |

|           |                     |           |           |           |           |           |           |           |           |           |           |           |          |           |           |           |           |           |
|-----------|---------------------|-----------|-----------|-----------|-----------|-----------|-----------|-----------|-----------|-----------|-----------|-----------|----------|-----------|-----------|-----------|-----------|-----------|
| 35        | STD TMDA-70.2       | 10.31     | 434       | 42.6      | <0.05     | 33        | 341.44    | 14.28     | 10.51     | 34        | 21.35     | 136.6     | <0.01    | 13        | 285.69    | 379.6     | <0.01     | 386.2     |
| 36        | BLK                 | <0.05     | <1        | <0.5      | <0.05     | <5        | <0.05     | <0.05     | <0.05     | <5        | <0.05     | <0.05     | <0.01    | <1        | <0.02     | <0.5      | <0.01     | <0.1      |
| 37        | BLK                 | <0.05     | <1        | 0.9       | <0.05     | <5        | <0.05     | <0.05     | <0.05     | <5        | <0.05     | <0.05     | <0.01    | <1        | <0.02     | <0.5      | <0.01     | <0.1      |
|           |                     | <b>Dy</b> | <b>Er</b> | <b>Eu</b> | <b>Fe</b> | <b>Ga</b> | <b>Gd</b> | <b>Ge</b> | <b>Hf</b> | <b>Hg</b> | <b>Ho</b> | <b>In</b> | <b>K</b> | <b>La</b> | <b>Li</b> | <b>Lu</b> | <b>Mg</b> | <b>Mn</b> |
|           |                     | PPB       | PPM      | PPB       | PPB       | PPB       | PPM       | PPB       |
|           |                     | 0.01      | 0.01      | 0.01      | 10        | 0.05      | 0.01      | 0.05      | 0.02      | 0.1       | 0.01      | 0.01      | 0.05     | 0.01      | 0.1       | 0.01      | 0.05      | 0.05      |
| <b>No</b> | <b>Sample</b>       |           |           |           |           |           |           |           |           |           |           |           |          |           |           |           |           |           |
| 1         | KW1A                | <0.01     | 0.1       | <0.01     | 117       | <0.05     | 0.01      | 0.11      | <0.02     | <0.1      | <0.01     | <0.01     | 2.75     | 0.07      | 3.4       | <0.01     | 6.55      | 2.62      |
| 2         | KW2A                | *         | *         | *         | <10000    | *         | *         | *         | *         | *         | *         | *         | 11       | <200      | <1000     | *         | 21        | 2429      |
| 3         | KW3A                | <0.01     | <0.01     | <0.01     | <10       | 0.12      | <0.01     | 0.2       | <0.02     | <0.1      | <0.01     | <0.01     | 0.55     | 0.03      | 1.4       | <0.01     | 14.22     | 4.42      |
| 4         | KW4A                | *         | *         | *         | <10000    | *         | *         | *         | *         | *         | *         | *         | 9        | <200      | <1000     | *         | 83        | 8456      |
| 5         | KW5A                | *         | *         | *         | <10000    | *         | *         | *         | *         | *         | *         | *         | 9        | <200      | <1000     | *         | 86        | 8136      |
| 6         | KW6A                | <0.01     | <0.01     | <0.01     | 23        | 0.35      | 0.01      | 0.24      | <0.02     | <0.1      | <0.01     | <0.01     | 4.13     | 0.08      | 2.3       | <0.01     | 7.63      | 20.97     |
| 7         | KW7A                | *         | *         | *         | <10000    | *         | *         | *         | *         | *         | *         | *         | 10       | <200      | <1000     | *         | 87        | 10321     |
| 8         | KW8A                | *         | *         | *         | <10000    | *         | *         | *         | *         | *         | *         | *         | 10       | <200      | <1000     | *         | 87        | 10251     |
| 9         | KW9A                | *         | *         | *         | <10000    | *         | *         | *         | *         | *         | *         | *         | 11       | <200      | <1000     | *         | 102       | 10478     |
| 10        | KW10A               | *         | *         | *         | <10000    | *         | *         | *         | *         | *         | *         | *         | 13       | <200      | <1000     | *         | 130       | 10747     |
| 11        | KW1B                | <0.01     | <0.01     | <0.01     | 111       | <0.05     | <0.01     | <0.05     | <0.02     | <0.1      | <0.01     | <0.01     | 2.69     | 0.03      | 0.4       | <0.01     | 6.61      | 5.83      |
| 12        | KW2B                | *         | *         | *         | <10000    | *         | *         | *         | *         | *         | *         | *         | 11       | <200      | <1000     | *         | 21        | 2420      |
| 13        | KW3B                | <0.01     | <0.01     | <0.01     | <10       | <0.05     | <0.01     | <0.05     | <0.02     | <0.1      | <0.01     | <0.01     | 0.5      | <0.01     | 1.1       | <0.01     | 13.83     | 2.01      |
| 14        | KW4B                | *         | *         | *         | <10000    | *         | *         | *         | *         | *         | *         | *         | 8        | <200      | <1000     | *         | 82        | 8377      |
| 15        | KW5B                | *         | *         | *         | <10000    | *         | *         | *         | *         | *         | *         | *         | 8        | <200      | <1000     | *         | 79        | 7846      |
| 16        | KW6B                | <0.01     | <0.01     | <0.01     | <10       | 0.25      | <0.01     | <0.05     | <0.02     | <0.1      | <0.01     | <0.01     | 4.23     | 0.1       | 2.5       | <0.01     | 8.43      | 11.98     |
| 17        | KW7B                | *         | *         | *         | <10000    | *         | *         | *         | *         | *         | *         | *         | 9        | <200      | <1000     | *         | 87        | 10457     |
| 18        | KW8B                | *         | *         | *         | <10000    | *         | *         | *         | *         | *         | *         | *         | 10       | <200      | <1000     | *         | 83        | 9908      |
| 19        | KW9B                | *         | *         | *         | <10000    | *         | *         | *         | *         | *         | *         | *         | 12       | <200      | <1000     | *         | 111       | 11420     |
| 20        | KW10B               | *         | *         | *         | <10000    | *         | *         | *         | *         | *         | *         | *         | 15       | <200      | <1000     | *         | 143       | 12255     |
| 21        | KW1C                | <0.01     | <0.01     | <0.01     | <10       | <0.05     | <0.01     | <0.05     | <0.02     | <0.1      | <0.01     | <0.01     | 2.8      | <0.01     | 0.5       | <0.01     | 7.1       | 0.14      |
| 22        | KW2C                | *         | *         | *         | <10000    | *         | *         | *         | *         | *         | *         | *         | 11       | <200      | <1000     | *         | 22        | 2613      |
| 23        | KW3C                | <0.01     | <0.01     | <0.01     | <10       | <0.05     | <0.01     | <0.05     | <0.02     | <0.1      | <0.01     | <0.01     | 0.53     | <0.01     | 1.4       | <0.01     | 15.46     | 0.34      |
| 24        | KW4C                | *         | *         | *         | <10000    | *         | *         | *         | *         | *         | *         | *         | 8        | <200      | <1000     | *         | 88        | 9106      |
| 25        | KW5C                | *         | *         | *         | <10000    | *         | *         | *         | *         | *         | *         | *         | 9        | <200      | <1000     | *         | 84        | 8435      |
| 26        | KW6C                | <0.01     | <0.01     | <0.01     | <10       | 0.13      | <0.01     | <0.05     | <0.02     | <0.1      | <0.01     | <0.01     | 4.15     | <0.01     | 2.6       | <0.01     | 8.3       | 0.66      |
| 27        | KW7C                | *         | *         | *         | <10000    | *         | *         | *         | *         | *         | *         | *         | 9        | <200      | <1000     | *         | 83        | 9966      |
| 28        | KW8C                | *         | *         | *         | <10000    | *         | *         | *         | *         | *         | *         | *         | 10       | <200      | <1000     | *         | 91        | 10860     |
| 29        | KW9C                | *         | *         | *         | <10000    | *         | *         | *         | *         | *         | *         | *         | 13       | <200      | <1000     | *         | 114       | 11960     |
| 30        | KW10C               | *         | *         | *         | <10000    | *         | *         | *         | *         | *         | *         | *         | 13       | <200      | <1000     | *         | 132       | 11137     |
| 31        | Pulp Duplicates     |           |           |           |           |           |           |           |           |           |           |           |          |           |           |           |           |           |
| 32        | KW1A                | <0.01     | 0.1       | <0.01     | 117       | <0.05     | 0.01      | 0.11      | <0.02     | <0.1      | <0.01     | <0.01     | 2.75     | 0.07      | 3.4       | <0.01     | 6.55      | 2.62      |
| 33        | KW1A                | 0.01      | 0.1       | <0.01     | 133       | 0.08      | <0.01     | 0.13      | <0.02     | <0.1      | <0.01     | <0.01     | 2.67     | 0.09      | 3.5       | <0.01     | 6.95      | 2.95      |
| 34        | Reference Materials |           |           |           |           |           |           |           |           |           |           |           |          |           |           |           |           |           |
| 35        | STD TMDA-70.2       | <0.01     | <0.01     | <0.01     | 413       | 0.09      | <0.01     | <0.05     | <0.02     | <0.1      | <0.01     | <0.01     | 0.94     | <0.01     | 17.9      | <0.01     | 5.31      | 302.7     |
| 36        | BLK                 | <0.01     | <0.01     | <0.01     | <10       | <0.05     | <0.01     | <0.05     | <0.02     | <0.1      | <0.01     | <0.01     | <0.05    | <0.01     | <0.1      | <0.01     | <0.05     | <0.05     |

| 37 | BLK                 | <0.01     | <0.01     | <0.01     | <10       | <0.05     | <0.01    | <0.05     | <0.02     | <0.1      | <0.01     | <0.01     | <0.05     | <0.01     | <0.1      | <0.01    | <0.05     | <0.05     |
|----|---------------------|-----------|-----------|-----------|-----------|-----------|----------|-----------|-----------|-----------|-----------|-----------|-----------|-----------|-----------|----------|-----------|-----------|
|    |                     | <b>Mo</b> | <b>Na</b> | <b>Nb</b> | <b>Nd</b> | <b>Ni</b> | <b>P</b> | <b>Pb</b> | <b>Pd</b> | <b>Pr</b> | <b>Pt</b> | <b>Rb</b> | <b>Re</b> | <b>Rh</b> | <b>Ru</b> | <b>S</b> | <b>Sb</b> | <b>Sc</b> |
|    |                     | PPB       | PPM       | PPB       | PPB       | PPB       | PPB      | PPB       | PPB       | PPB       | PPB       | PPB       | PPB       | PPB       | PPB       | PPM      | PPB       | PPB       |
|    | <b>DL</b>           | 0.1       | 0.05      | 0.01      | 0.01      | 0.2       | 10       | 0.1       | 0.2       | 0.01      | 0.01      | 0.01      | 0.01      | 0.01      | 0.05      | 1        | 0.05      | 1         |
| No | Sample              |           |           |           |           |           |          |           |           |           |           |           |           |           |           |          |           |           |
| 1  | KW1A                | 0.5       | 10.8      | <0.01     | 0.26      | 1.8       | 52       | 6.3       | <0.2      | <0.01     | <0.01     | 1.8       | <0.01     | <0.01     | <0.05     | 4        | 0.08      | <1        |
| 2  | KW2A                | <300      | 58        | *         | *         | <300      | <4000    | <4000     | *         | *         | *         | *         | *         | *         | *         | 589      | <2000     | *         |
| 3  | KW3A                | <0.1      | 3.7       | <0.01     | <0.01     | 0.2       | <10      | 1.4       | <0.2      | <0.01     | <0.01     | 2.16      | <0.01     | <0.01     | <0.05     | 12       | <0.05     | <1        |
| 4  | KW4A                | <300      | 85        | *         | *         | <300      | <4000    | <4000     | *         | *         | *         | *         | *         | *         | *         | 576      | <2000     | *         |
| 5  | KW5A                | <300      | 87        | *         | *         | <300      | <4000    | <4000     | *         | *         | *         | *         | *         | *         | *         | 589      | <2000     | *         |
| 6  | KW6A                | 1.3       | 14.35     | <0.01     | 0.05      | 7         | 175      | 1.1       | <0.2      | 0.01      | <0.01     | 3.56      | <0.01     | <0.01     | <0.05     | 7        | 0.32      | <1        |
| 7  | KW7A                | <300      | 93        | *         | *         | <300      | <4000    | <4000     | *         | *         | *         | *         | *         | *         | *         | 630      | <2000     | *         |
| 8  | KW8A                | <300      | 91        | *         | *         | <300      | <4000    | <4000     | *         | *         | *         | *         | *         | *         | *         | 627      | <2000     | *         |
| 9  | KW9A                | <300      | 106       | *         | *         | <300      | <4000    | <4000     | *         | *         | *         | *         | *         | *         | *         | 769      | <2000     | *         |
| 10 | KW10A               | <300      | 110       | *         | *         | <300      | <4000    | <4000     | *         | *         | *         | *         | *         | *         | *         | 945      | <2000     | *         |
| 11 | KW1B                | 1         | 11.08     | <0.01     | 0.02      | 3         | 59       | 2.3       | <0.2      | <0.01     | <0.01     | 1.7       | <0.01     | <0.01     | <0.05     | 4        | 0.13      | <1        |
| 12 | KW2B                | <300      | 53        | *         | *         | <300      | <4000    | <4000     | *         | *         | *         | *         | *         | *         | *         | 578      | <2000     | *         |
| 13 | KW3B                | <0.1      | 3.5       | <0.01     | <0.01     | 1.4       | 15       | 0.8       | <0.2      | <0.01     | <0.01     | 2         | <0.01     | <0.01     | <0.05     | 10       | <0.05     | <1        |
| 14 | KW4B                | <300      | 86        | *         | *         | <300      | <4000    | <4000     | *         | *         | *         | *         | *         | *         | *         | 560      | <2000     | *         |
| 15 | KW5B                | <300      | 82        | *         | *         | <300      | <4000    | <4000     | *         | *         | *         | *         | *         | *         | *         | 550      | <2000     | *         |
| 16 | KW6B                | 1.8       | 14.15     | <0.01     | 0.04      | 6.4       | 187      | 4.2       | <0.2      | <0.01     | <0.01     | 3.58      | <0.01     | <0.01     | <0.05     | 8        | 0.38      | <1        |
| 17 | KW7B                | <300      | 94        | *         | *         | <300      | <4000    | <4000     | *         | *         | *         | *         | *         | *         | *         | 633      | <2000     | *         |
| 18 | KW8B                | <300      | 88        | *         | *         | <300      | <4000    | <4000     | *         | *         | *         | *         | *         | *         | *         | 608      | <2000     | *         |
| 19 | KW9B                | <300      | 116       | *         | *         | <300      | <4000    | <4000     | *         | *         | *         | *         | *         | *         | *         | 840      | <2000     | *         |
| 20 | KW10B               | <300      | 127       | *         | *         | <300      | <4000    | <4000     | *         | *         | *         | *         | *         | *         | *         | 1051     | <2000     | *         |
| 21 | KW1C                | 0.5       | 11.88     | <0.01     | <0.01     | 1         | 12       | <0.1      | <0.2      | <0.01     | <0.01     | 2.32      | <0.01     | <0.01     | <0.05     | 4        | 0.09      | <1        |
| 22 | KW2C                | <300      | 57        | *         | *         | <300      | <4000    | <4000     | *         | *         | *         | *         | *         | *         | *         | 625      | <2000     | *         |
| 23 | KW3C                | <0.1      | 4.19      | <0.01     | <0.01     | <0.2      | <10      | <0.1      | <0.2      | <0.01     | <0.01     | 2.09      | <0.01     | <0.01     | <0.05     | 11       | <0.05     | <1        |
| 24 | KW4C                | <300      | 89        | *         | *         | <300      | <4000    | <4000     | *         | *         | *         | *         | *         | *         | *         | 611      | <2000     | *         |
| 25 | KW5C                | <300      | 86        | *         | *         | <300      | <4000    | <4000     | *         | *         | *         | *         | *         | *         | *         | 591      | <2000     | *         |
| 26 | KW6C                | 1.7       | 15.06     | <0.01     | <0.01     | 4.2       | 118      | <0.1      | <0.2      | <0.01     | <0.01     | 3.25      | <0.01     | <0.01     | <0.05     | 8        | 0.4       | <1        |
| 27 | KW7C                | <300      | 91        | *         | *         | <300      | <4000    | <4000     | *         | *         | *         | *         | *         | *         | *         | 609      | <2000     | *         |
| 28 | KW8C                | <300      | 100       | *         | *         | <300      | <4000    | <4000     | *         | *         | *         | *         | *         | *         | *         | 669      | <2000     | *         |
| 29 | KW9C                | <300      | 117       | *         | *         | <300      | <4000    | <4000     | *         | *         | *         | *         | *         | *         | *         | 807      | <2000     | *         |
| 30 | KW10C               | <300      | 117       | *         | *         | <300      | <4000    | <4000     | *         | *         | *         | *         | *         | *         | *         | 973      | <2000     | *         |
| 31 | Pulp Duplicates     |           |           |           |           |           |          |           |           |           |           |           |           |           |           |          |           |           |
| 32 | KW1A                | 0.5       | 10.8      | <0.01     | 0.26      | 1.8       | 52       | 6.3       | <0.2      | <0.01     | <0.01     | 1.8       | <0.01     | <0.01     | <0.05     | 4        | 0.08      | <1        |
| 33 | KW1A                | 0.6       | 11.84     | <0.01     | 0.24      | 1.8       | 42       | 6.1       | <0.2      | 0.01      | <0.01     | 1.82      | <0.01     | <0.01     | <0.05     | 4        | 0.1       | <1        |
| 34 | Reference Materials |           |           |           |           |           |          |           |           |           |           |           |           |           |           |          |           |           |
| 35 | STD TMDA-70.2       | 270.1     | 8.42      | <0.01     | <0.01     | 315.5     | <10      | 431.2     | <0.2      | <0.01     | <0.01     | 0.73      | <0.01     | 0.01      | <0.05     | 5        | 21.66     | <1        |
| 36 | BLK                 | <0.1      | <0.05     | <0.01     | <0.01     | <0.2      | <10      | <0.1      | <0.2      | <0.01     | <0.01     | <0.01     | <0.01     | <0.01     | <0.05     | <1       | <0.05     | <1        |
| 37 | BLK                 | <0.1      | <0.05     | <0.01     | <0.01     | <0.2      | <10      | <0.1      | <0.2      | <0.01     | <0.01     | <0.01     | <0.01     | <0.01     | <0.05     | <1       | <0.05     | <1        |

|    |                     | Se   | Si   | Sm    | Sn    | Sr     | Ta    | Tb    | Te    | Th    | Ti   | Tl    | Tm    | U     | V     | W     | Y     | Yb    |
|----|---------------------|------|------|-------|-------|--------|-------|-------|-------|-------|------|-------|-------|-------|-------|-------|-------|-------|
|    | DL                  | PPB  | PPB  | PPB   | PPB   | PPB    | PPB   | PPB   | PPB   | PPB   | PPB  | PPB   | PPB   | PPB   | PPB   | PPB   | PPB   | PPB   |
|    |                     | 0.5  | 40   | 0.02  | 0.05  | 0.01   | 0.02  | 0.01  | 0.05  | 0.05  | 10   | 0.01  | 0.01  | 0.02  | 0.2   | 0.02  | 0.01  | 0.01  |
| No | Sample              |      |      |       |       |        |       |       |       |       |      |       |       |       |       |       |       |       |
| 1  | KW1A                | <0.5 | 3828 | <0.02 | 0.2   | 95.16  | <0.02 | <0.01 | <0.05 | <0.05 | <10  | <0.01 | <0.01 | 0.36  | 26.8  | 0.08  | 0.05  | <0.01 |
| 2  | KW2A                | *    | *    | *     | *     | 412    | *     | *     | *     | <500  | <100 | *     | *     | <3000 | <200  | <2000 | *     | *     |
| 3  | KW3A                | 0.6  | 5769 | <0.02 | 0.12  | 15.55  | <0.02 | <0.01 | <0.05 | <0.05 | <10  | <0.01 | <0.01 | 0.05  | 51.3  | <0.02 | 0.01  | <0.01 |
| 4  | KW4A                | *    | *    | *     | *     | 352    | *     | *     | *     | <500  | <100 | *     | *     | <3000 | <200  | <2000 | *     | *     |
| 5  | KW5A                | *    | *    | *     | *     | 366    | *     | *     | *     | <500  | <100 | *     | *     | <3000 | <200  | <2000 | *     | *     |
| 6  | KW6A                | 0.6  | 2720 | <0.02 | 0.15  | 86.08  | <0.02 | <0.01 | <0.05 | <0.05 | <10  | <0.01 | <0.01 | 0.7   | 55.2  | 0.18  | 0.08  | <0.01 |
| 7  | KW7A                | *    | *    | *     | *     | 393    | *     | *     | *     | <500  | <100 | *     | *     | <3000 | <200  | <2000 | *     | *     |
| 8  | KW8A                | *    | *    | *     | *     | 390    | *     | *     | *     | <500  | <100 | *     | *     | <3000 | <200  | <2000 | *     | *     |
| 9  | KW9A                | *    | *    | *     | *     | 441    | *     | *     | *     | <500  | <100 | *     | *     | <3000 | <200  | <2000 | *     | *     |
| 10 | KW10A               | *    | *    | *     | *     | 493    | *     | *     | *     | <500  | <100 | *     | *     | <3000 | <200  | <2000 | *     | *     |
| 11 | KW1B                | <0.5 | 3621 | <0.02 | 0.07  | 90.43  | <0.02 | <0.01 | <0.05 | <0.05 | <10  | <0.01 | <0.01 | 0.4   | 6.4   | 0.03  | 0.04  | <0.01 |
| 12 | KW2B                | *    | *    | *     | *     | 403    | *     | *     | *     | <500  | <100 | *     | *     | <3000 | <200  | <2000 | *     | *     |
| 13 | KW3B                | <0.5 | 5469 | <0.02 | 0.07  | 14.56  | <0.02 | <0.01 | <0.05 | <0.05 | <10  | <0.01 | <0.01 | 0.08  | <0.2  | <0.02 | <0.01 | <0.01 |
| 14 | KW4B                | *    | *    | *     | *     | 349    | *     | *     | *     | <500  | <100 | *     | *     | <3000 | <200  | <2000 | *     | *     |
| 15 | KW5B                | *    | *    | *     | *     | 337    | *     | *     | *     | <500  | <100 | *     | *     | <3000 | <200  | <2000 | *     | *     |
| 16 | KW6B                | <0.5 | 3028 | <0.02 | 0.08  | 93.15  | <0.02 | <0.01 | <0.05 | <0.05 | <10  | <0.01 | <0.01 | 0.85  | 1.9   | 0.2   | 0.08  | 0.01  |
| 17 | KW7B                | *    | *    | *     | *     | 393    | *     | *     | *     | <500  | <100 | *     | *     | <3000 | <200  | <2000 | *     | *     |
| 18 | KW8B                | *    | *    | *     | *     | 371    | *     | *     | *     | <500  | <100 | *     | *     | <3000 | <200  | <2000 | *     | *     |
| 19 | KW9B                | *    | *    | *     | *     | 478    | *     | *     | *     | <500  | <100 | *     | *     | <3000 | <200  | <2000 | *     | *     |
| 20 | KW10B               | *    | *    | *     | *     | 547    | *     | *     | *     | <500  | <100 | *     | *     | <3000 | <200  | <2000 | *     | *     |
| 21 | KW1C                | <0.5 | 4061 | <0.02 | <0.05 | 96.97  | <0.02 | <0.01 | <0.05 | <0.05 | <10  | <0.01 | <0.01 | 0.23  | <0.2  | 0.06  | <0.01 | <0.01 |
| 22 | KW2C                | *    | *    | *     | *     | 434    | *     | *     | *     | <500  | <100 | *     | *     | <3000 | <200  | <2000 | *     | *     |
| 23 | KW3C                | <0.5 | 6353 | <0.02 | <0.05 | 15.72  | <0.02 | <0.01 | <0.05 | <0.05 | <10  | <0.01 | <0.01 | 0.05  | <0.2  | 0.02  | <0.01 | <0.01 |
| 24 | KW4C                | *    | *    | *     | *     | 374    | *     | *     | *     | <500  | <100 | *     | *     | <3000 | <200  | <2000 | *     | *     |
| 25 | KW5C                | *    | *    | *     | *     | 360    | *     | *     | *     | <500  | <100 | *     | *     | <3000 | <200  | <2000 | *     | *     |
| 26 | KW6C                | <0.5 | 3191 | <0.02 | <0.05 | 95.61  | <0.02 | <0.01 | <0.05 | <0.05 | <10  | <0.01 | <0.01 | 0.65  | <0.2  | 0.21  | <0.01 | <0.01 |
| 27 | KW7C                | *    | *    | *     | *     | 370    | *     | *     | *     | <500  | <100 | *     | *     | <3000 | <200  | <2000 | *     | *     |
| 28 | KW8C                | *    | *    | *     | *     | 411    | *     | *     | *     | <500  | <100 | *     | *     | <3000 | <200  | <2000 | *     | *     |
| 29 | KW9C                | *    | *    | *     | *     | 482    | *     | *     | *     | <500  | <100 | *     | *     | <3000 | <200  | <2000 | *     | *     |
| 30 | KW10C               | *    | *    | *     | *     | 499    | *     | *     | *     | <500  | <100 | *     | *     | <3000 | <200  | <2000 | *     | *     |
| 31 | Pulp Duplicates     |      |      |       |       |        |       |       |       |       |      |       |       |       |       |       |       |       |
| 32 | KW1A                | <0.5 | 3828 | <0.02 | 0.2   | 95.16  | <0.02 | <0.01 | <0.05 | <0.05 | <10  | <0.01 | <0.01 | 0.36  | 26.8  | 0.08  | 0.05  | <0.01 |
| 33 | KW1A                | <0.5 | 4008 | <0.02 | 0.11  | 97.54  | <0.02 | <0.01 | <0.05 | <0.05 | <10  | <0.01 | <0.01 | 0.37  | 38.8  | 0.09  | 0.04  | <0.01 |
| 34 | Reference Materials |      |      |       |       |        |       |       |       |       |      |       |       |       |       |       |       |       |
| 35 | STD TMDA-70.2       | 26.9 | 377  | <0.02 | <0.05 | 456.07 | <0.02 | <0.01 | <0.05 | <0.05 | <10  | 21.72 | <0.01 | 59.22 | 297.8 | 0.1   | <0.01 | <0.01 |
| 36 | BLK                 | <0.5 | <40  | <0.02 | <0.05 | 0.02   | <0.02 | <0.01 | <0.05 | <0.05 | <10  | <0.01 | <0.01 | <0.02 | <0.2  | <0.02 | <0.01 | <0.01 |
| 37 | BLK                 | <0.5 | <40  | <0.02 | <0.05 | <0.01  | <0.02 | <0.01 | <0.05 | <0.05 | <10  | <0.01 | <0.01 | <0.02 | <0.2  | <0.02 | <0.01 | <0.01 |

\*= Not detectable. 3 samples (A, B & C) were collected from each sampling point. X = Elements that were above the World Health Organization (WHO, 2017) 'maximum allowable concentration' (MAC) levels
